# Supplementary material for: Assessment of three antibiotic combination regimens against Gram-negative bacteria causing neonatal sepsis in low- and middle-income countries
Source: Springer Nature journal article supplement (doi:10.1038/s41467-024-48296-z), 2024-05-10
Supplement: MOESM1 [file 41467_2024_48296_MOESM1_ESM.pdf]

1 **Supplementary Table 1.** In vitro susceptibility of *K. pneumoniae* (n=87) and *E. coli* (n=21)  
 2 isolates to selected antimicrobial agents.

3

| <b>Antibiotic</b>           | <b>MIC ranges</b> | <b>MIC<sub>50</sub><br/>(mg/L)</b> | <b>MIC<sub>90</sub><br/>(mg/L)</b> | <b>EUCAST<br/>R%</b> |
|-----------------------------|-------------------|------------------------------------|------------------------------------|----------------------|
| <b><i>K. pneumoniae</i></b> |                   |                                    |                                    |                      |
| Ampicillin                  | 8- >128           | >128                               | >128                               | 98                   |
| Piperacillin-Tazobactam     | 8/4- >256/4       | 32/4                               | >256/4                             | 65                   |
| Flomoxef                    | 0.06- >128        | 0.25                               | >128                               | 34*                  |
| Cefotaxime                  | 0.03- >128        | >128                               | >128                               | 85                   |
| Meropenem                   | 0.03- >128        | 0.06                               | >128                               | 30                   |
| Amikacin                    | 1- >256           | 4                                  | >256                               | 31                   |
| Gentamicin                  | 0.25- >256        | 64                                 | >256                               | 74                   |
| Fosfomycin                  | 1- >512           | 8                                  | 64                                 | 11                   |
| <b><i>E. coli</i></b>       |                   |                                    |                                    |                      |
| Ampicillin                  | 4->128            | >128                               | >128                               | 90                   |
| Piperacillin-Tazobactam     | 1/4->256/4        | 2/4                                | 32/4                               | 33                   |
| Flomoxef                    | <=0.06- >128      | 0.12                               | 0.5                                | 10*                  |
| Cefotaxime                  | 0.06->128         | 0,5                                | >128                               | 47                   |
| Meropenem                   | 0.03-32           | 0.03                               | 0.06                               | 5                    |
| Amikacin                    | 2->256            | 4                                  | 32                                 | 14                   |
| Gentamicin                  | 0.5->256          | 2                                  | 256                                | 38                   |
| Fosfomycin                  | 0.5->512          | 0.5                                | 1                                  | 5                    |

4 \*Isolates were reported as susceptible to flomoxef up to a MIC of  $\leq 1$  mg/L [34]

5 MIC ranges, MIC<sub>50</sub>, MIC<sub>90</sub> values and percentages of resistance are according to the  
 6 EUCAST clinical breakpoints (v13.0, January 2023)

## Supplementary Fig. 1

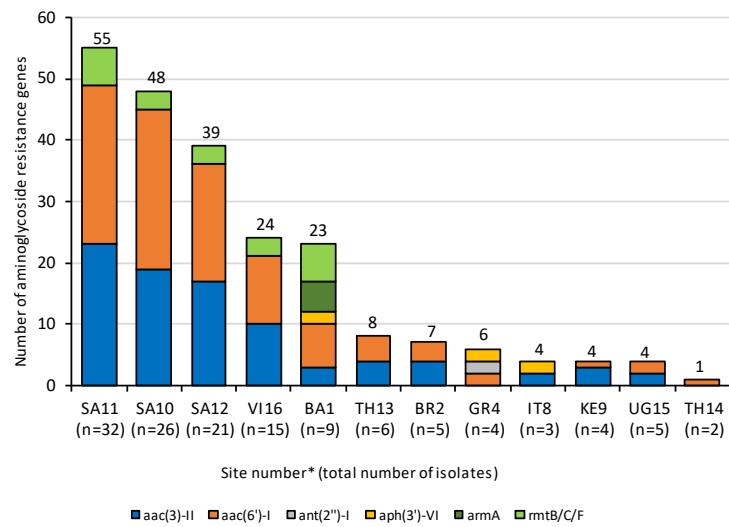

**Supplementary Fig. 1. Distribution of aminoglycoside resistance genes of *K. pneumoniae* isolates (n=135) by site.** (n) = total number of *K. pneumoniae* isolates per site found. Two sites that collected *K. pneumoniae* isolates (BR3 n=3 and TH14 n=2) without aminoglycoside resistance genes being detected, are not represented in this figure. Several isolates were carrying more than one resistance gene to a given class of antimicrobial agents. Other aminoglycoside resistance genes: *aadA*, *aph(6')*-I (streptomycin resistance) and *aph(3')*-I (neomycin/kanamycin resistance) were very frequent but are not represented in this figure due to their lack of relevance for the treatment of sepsis in humans. \*VI: Vietnam, UG: Uganda, TH: Thailand, SA: South Africa, KE: Kenya, IT: Italy, GR: Greece, BR: Brazil, BA: Bangladesh. The numbers following the country keys refer to the site number. Source data are provided as a Source Data file.

## Supplementary Fig. 2

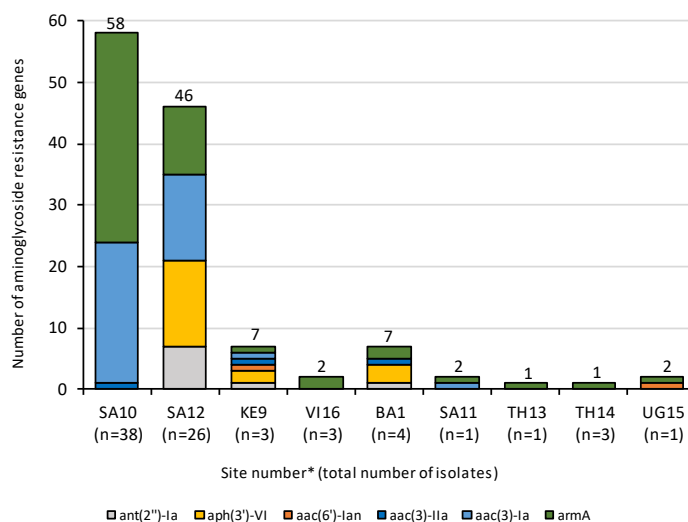

### Supplementary Fig. 2. Distribution of aminoglycoside resistance genes of *A. baumannii* isolates

(n=80) per site. (n) = total number of *A. baumannii* isolates collected per site. *aph(3')-VI* (n=2) and *aph(3')-VIa* (n=17) are grouped together. Several isolates carried more than one resistance gene to a

given class of antimicrobial agents. \*VI: Vietnam, UG: Uganda, TH: Thailand, SA: South Africa, KE:

Kenya, IT: Italy, GR: Greece, BR: Brazil, BA: Bangladesh. The numbers following the country keys refer

to the site number. Source data are provided as a Source Data file.
